# Supplementary material
Source: MDPI journal article supplement (https://www.mdpi.com/1999-4907/14/8/1684)
Supplement: s1 [file s1]

**Supplementary Material:**

Table S1 Details of the genetic linkage maps from the cross of 'Kuili' and 'YLZ1'.

Table S2. Details of the genetic linkage map of male parent 'YLZ1'.

Table S3. Details of the genetic linkage map of female parent 'Kuili'.

Table S4 Population segregation characteristics of leaf phenotypic traits and photosynthetic physiological indices in F<sub>1</sub> generation.

Table S1 Details of the genetic linkage maps from the cross of 'Kuili' and 'YLZ1'.

| Group | marker_number | Map length(cM) | Average distance (cM) | Max.gap(cM) |
|-------|---------------|----------------|-----------------------|-------------|
| lg1   | 317           | 99.79          | 0.31                  | 6.36        |
| lg2   | 487           | 202.69         | 0.42                  | 5           |
| lg3   | 584           | 169.13         | 0.29                  | 4.78        |
| lg4   | 485           | 138.01         | 0.28                  | 3.4         |
| lg5   | 339           | 100.97         | 0.3                   | 8.97        |
| lg6   | 679           | 242.76         | 0.36                  | 5.83        |
| lg7   | 367           | 120.38         | 0.33                  | 3.99        |
| lg8   | 310           | 104.96         | 0.34                  | 2.82        |
| lg9   | 171           | 197.41         | 1.15                  | 7.77        |
| lg10  | 214           | 215.28         | 1.01                  | 8.04        |
| lg11  | 343           | 93.87          | 0.27                  | 3.45        |
| lg12  | 282           | 127.21         | 0.45                  | 8.36        |
| total | 4578          | 1812.46        | 0.4                   | 8.97        |

Table S2 Details of the genetic linkage map of male parent 'YLZ1'.

| Group | marker_number | Map length(cM) | Average distance (cM) | Max.gap(cM) |
|-------|---------------|----------------|-----------------------|-------------|
| lg1   | 241           | 127.89         | 0.53                  | 9.24        |
| lg2   | 351           | 253.44         | 0.72                  | 8.3         |
| lg3   | 442           | 212.9          | 0.48                  | 6.89        |
| lg4   | 350           | 177.24         | 0.51                  | 5.18        |
| lg5   | 229           | 108.84         | 0.48                  | 11.31       |
| lg6   | 520           | 297.42         | 0.57                  | 8.3         |
| lg7   | 268           | 149.24         | 0.56                  | 4.58        |
| lg8   | 175           | 114.77         | 0.66                  | 5.63        |
| lg9   | 159           | 253.73         | 1.6                   | 10.97       |
| lg10  | 77            | 161.89         | 2.1                   | 11.14       |
| lg11  | 281           | 134.37         | 0.48                  | 6.4         |
| lg12  | 177           | 176.99         | 1                     | 13.52       |
| total | 3270          | 2168.7         | 0.66                  | 13.52       |

Table S3 Details of the genetic linkage map of female parent 'Kuili'.

| Group | marker_number | Map length(cM) | Average distance (cM) | Max.gap(cM) |
|-------|---------------|----------------|-----------------------|-------------|
| lg1   | 129           | 54.88          | 0.43                  | 6.26        |

|       |      |         |      |       |
|-------|------|---------|------|-------|
| lg2   | 253  | 150.28  | 0.59 | 4.67  |
| lg3   | 260  | 119.19  | 0.46 | 7.66  |
| lg4   | 206  | 85.33   | 0.41 | 5.18  |
| lg5   | 180  | 73.96   | 0.41 | 3.39  |
| lg6   | 279  | 188.12  | 0.67 | 10.37 |
| lg7   | 171  | 91.52   | 0.54 | 9.73  |
| lg8   | 184  | 89.6    | 0.49 | 3.87  |
| lg9   | 51   | 85.22   | 1.67 | 10.72 |
| lg10  | 194  | 251.82  | 1.3  | 12.92 |
| lg11  | 145  | 53.36   | 0.37 | 3.39  |
| lg12  | 178  | 76.3    | 0.43 | 10.13 |
| total | 2230 | 1319.58 | 0.59 | 12.92 |

Table S4 Population segregation characteristics of leaf phenotypic traits and photosynthetic physiological indices in F<sub>1</sub> generation.

| Traits                                         | Mean   | Variance | SD     | Variation range | CV (%) | Skewness | Kurtosis |
|------------------------------------------------|--------|----------|--------|-----------------|--------|----------|----------|
| Leaf length (cm)                               | 19.47  | 6.22     | 2.49   | 13.39 ~ 27.74   | 12.82  | 0.00     | 0.08     |
| Leaf width (cm)                                | 7.44   | 0.84     | 0.92   | 5.18 ~ 9.67     | 12.35  | -0.11    | -0.36    |
| Leaf shape index                               | 2.63   | 0.06     | 0.24   | 2.07 ~ 3.38     | 9.23   | 0.34     | 0.15     |
| Leaf area (cm <sup>2</sup> )                   | 106.80 | 585.50   | 24.20  | 53.83 ~ 172.98  | 22.67  | -0.02    | -0.24    |
| Petiole length (cm)                            | 1.16   | 0.14     | 0.38   | 0.39 ~ 2.22     | 32.92  | 0.22     | -0.55    |
| Leaf fresh weight (g)                          | 2.12   | 0.36     | 0.60   | 0.84 ~ 3.59     | 28.35  | -0.02    | -0.30    |
| Leaf dry weight (g)                            | 0.93   | 0.07     | 0.26   | 0.41 ~ 1.61     | 27.49  | 0.08     | -0.28    |
| Leaf moisture content (%)                      | 55.53  | 13.07    | 3.62   | 41.22 ~ 66.93   | 6.51   | -1.48    | 4.41     |
| Specific leaf weight (g/cm <sup>2</sup> )      | 0.0087 | 0.0000   | 0.0011 | 0.0063 ~ 0.0114 | 13.13  | 0.07     | -0.47    |
| $P_n$ (μmol.m <sup>-2</sup> .s <sup>-1</sup> ) | 13.25  | 8.98     | 3.00   | 6.71 ~ 21.71    | 22.61  | -0.17    | -0.26    |
| $G_s$ (mol.m <sup>-2</sup> .s <sup>-1</sup> )  | 0.1945 | 0.0038   | 0.0622 | 0.0717 ~ 0.3917 | 31.95  | 0.48     | 0.27     |
| $C_i$ (mol.mol <sup>-1</sup> )                 | 220.85 | 526.53   | 22.95  | 166.91 ~ 324.87 | 10.39  | 0.50     | 1.86     |
| $T_r$ (mmol.m <sup>-2</sup> .s <sup>-1</sup> ) | 5.11   | 1.63     | 1.28   | 2.15 ~ 8.34     | 25.03  | 0.05     | -0.34    |
| WUE/ (mmol.mol <sup>-1</sup> )                 | 2.68   | 0.32     | 0.57   | 1.46 ~ 4.83     | 21.20  | 0.35     | 0.57     |
| Chl-a/ (mg.g <sup>-1</sup> )                   | 0.71   | 0.04     | 0.19   | 0.30 ~ 1.44     | 26.79  | 0.51     | 0.62     |
| Chl-b/ (mg.g <sup>-1</sup> )                   | 0.22   | 0.00     | 0.06   | 0.09 ~ 0.47     | 27.71  | 0.59     | 0.80     |
| Chl-a+b/ (mg.g <sup>-1</sup> )                 | 0.93   | 0.06     | 0.25   | 0.39 ~ 1.91     | 26.79  | 0.49     | 0.63     |
| Chl-a/b                                        | 3.23   | 0.05     | 0.22   | 2.38 ~ 3.89     | 6.72   | -0.66    | 2.01     |
